# Supplementary material for: Three chromosome-level duck genome assemblies provide insights into genomic variation during domestication
Source: PubMed Central journal article supplement (PMC8505442; doi:10.1038/s41467-021-26272-1), 2021-10-11
Supplement: 41467_2021_26272_MOESM2_ESM.pdf [file 41467_2021_26272_MOESM2_ESM.pdf]

## **Description of Additional Supplementary Files**

File Name: Supplementary Data 1

Description: The summary of radiation hybrid-map (RH) markers mapping to duck genomes.

File Name: Supplementary Data 2

Description: Mammalian or lizard genes that are not present in mallard transcripts.

File Name: Supplementary Data 3

Description: The transcripts of the paralogs of the `missing genes` in the Mallard genome.

File Name: Supplementary Data 4

Description: Annotation of putative PAVs in duck genomes.

File Name: Supplementary Data 5

Description: Information on validated PAVs in duck genomes.

File Name: Supplementary Data 6

Description: Enrichment analysis for validated PAVs.

File Name: Supplementary Data 7

Description: Differentially expressed genes between Pekin duck and Mallard in different tissues.

File Name: Supplementary Data 8

Description: Information on putative SVs in duck genomes.

File Name: Supplementary Data 9

Description: The SNP frequency within gene regions (including upstream and downstream regions).

File Name: Supplementary Data 10

Description: Details for sample sequencing.

File Name: Supplementary Data 11

Description: Sequence information for the CTL family used in phylogenetic analysis.
